# Supplementary material for: Ex vivo Validation of Noninvasive Epicardial and Endocardial Repolarization Mapping
Source: Frontiers journal article supplement (doi:10.3389/fphys.2021.737609), 2021-10-22
Supplement: Data_Sheet_1.PDF [file Data_Sheet_1.PDF]

## *Supplementary Material*

### **1 Supplementary Results**

#### ***Reproducibility of subsequent beats***

We tested the reproducibility of the ECGI reconstruction for consecutive, unique beats, to demonstrate the reliability of the method for subsequent beats. We used an LV paced beat from a single heart (heart 4), and selected three subsequent beats. Resulting repolarization patterns are shown in Supplemental Figure 1, with only very minor differences between repolarization patterns. Supplemental Figure 2 shows the corresponding scatterplots for activation and repolarization, and numerical results are summarized in Supplemental Table 1. We conclude that ECGI produces repolarization patterns that are reproducible for subsequent beats.

#### **1.1 Supplementary Figures**

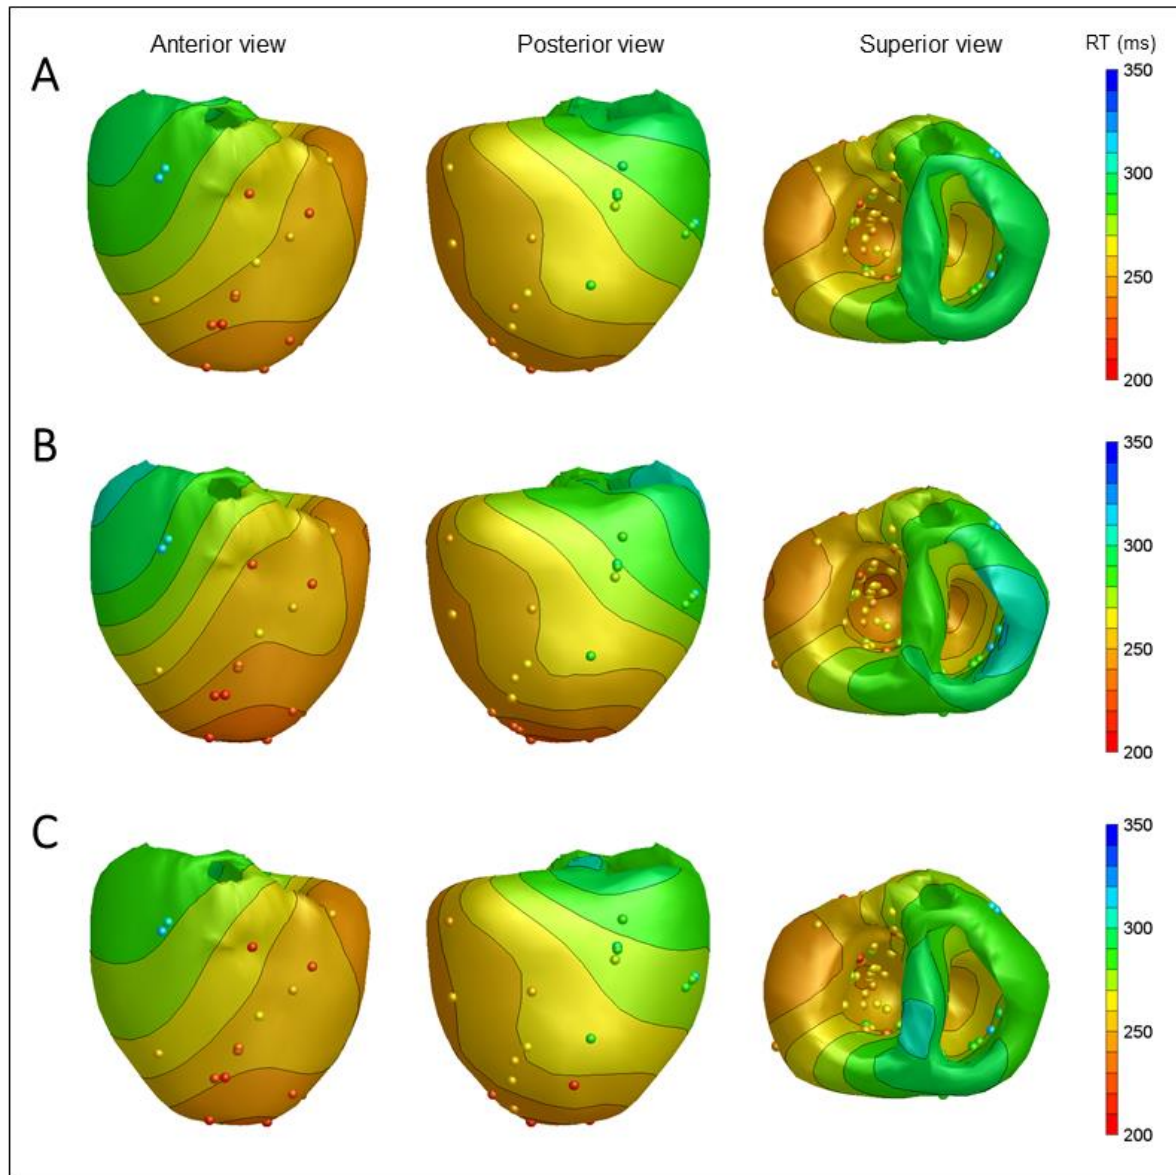

**Supplementary Figure 1.** Repolarization patterns of heart 4, LV paced beat. Surface color indicating the inverse calculated repolarization pattern and spheres indicating electrode measurement sites with color indicating the corresponding measured RT. Panel A shows the repolarization pattern included in the main text, panel B and C show results for subsequent beats.

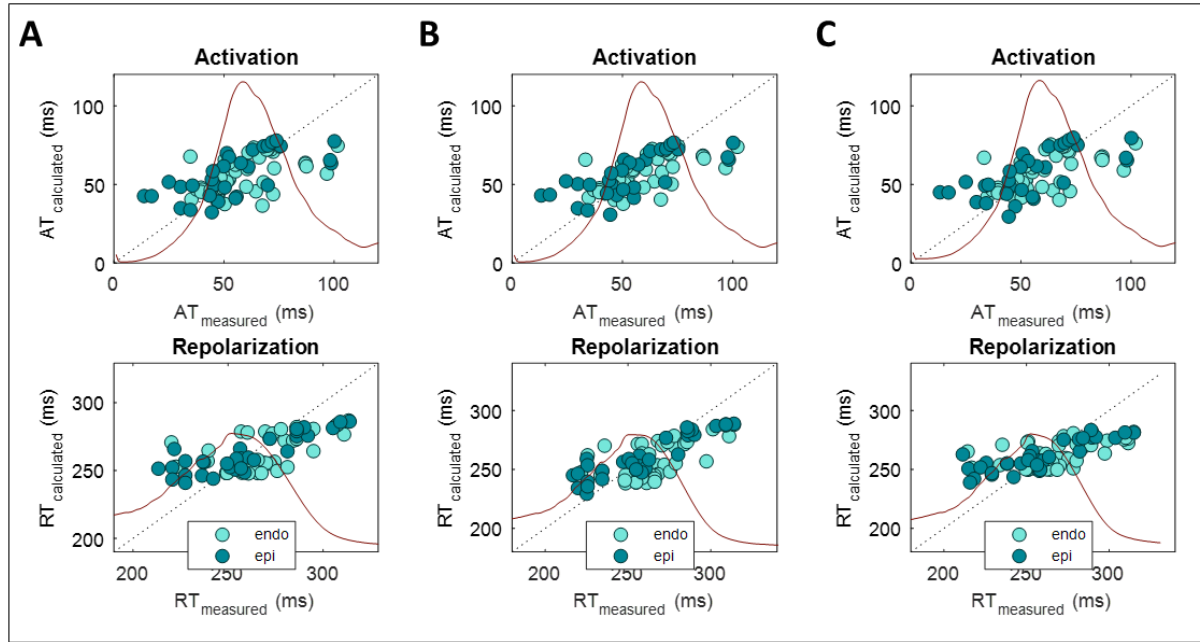

**Supplemental Figure 2:** Measured versus calculated AT (upper panel) and RT (lower panel) of subsequent repolarizations corresponding to the maps in supplemental figure 2 (A,B,C) on electrode sites. Endocardial and epicardial sites are indicated by differently colored dots. For reference, the root-mean-square of the corresponding QRS complex and T-wave are plotted within the figure.

**Supplemental Table 1:** Comparison parameters between reconstructed and measured pseudo-ECGs (Cor=correlation, Rd=relative difference) and repolarization times (Abs diff rep=absolute difference in RT, Range= min-max RT) for three subsequent LV paced beats.

|           | Beat        | Cor<br>ECG | Rd<br>ECG | Abs diff<br>rep (ms) | N<br>electrodes | Range<br>reconstructed<br>(ms) | Range<br>measured<br>(ms) |
|-----------|-------------|------------|-----------|----------------------|-----------------|--------------------------------|---------------------------|
| <b>H4</b> | <i>LV_1</i> | 0.99       | 0.21      | 14.2±10.9            | 79              | 240 - 299                      | 213 - 314                 |
|           | <i>LV_2</i> | 0.99       | 0.21      | 14.4+-9.6            | 79              | 227 – 313                      | 216 – 314                 |
|           | <i>LV_3</i> | 0.99       | 0.21      | 15.5+-12.3           | 79              | 238 – 302                      | 211 – 315                 |
